# Supplementary material
Source: PubMed Central journal article supplement (PMC6851467)
Supplement: NIHMS1533917-supplement-1.pdf [file NIHMS1533917-supplement-1.pdf]

**A**

Species Richness

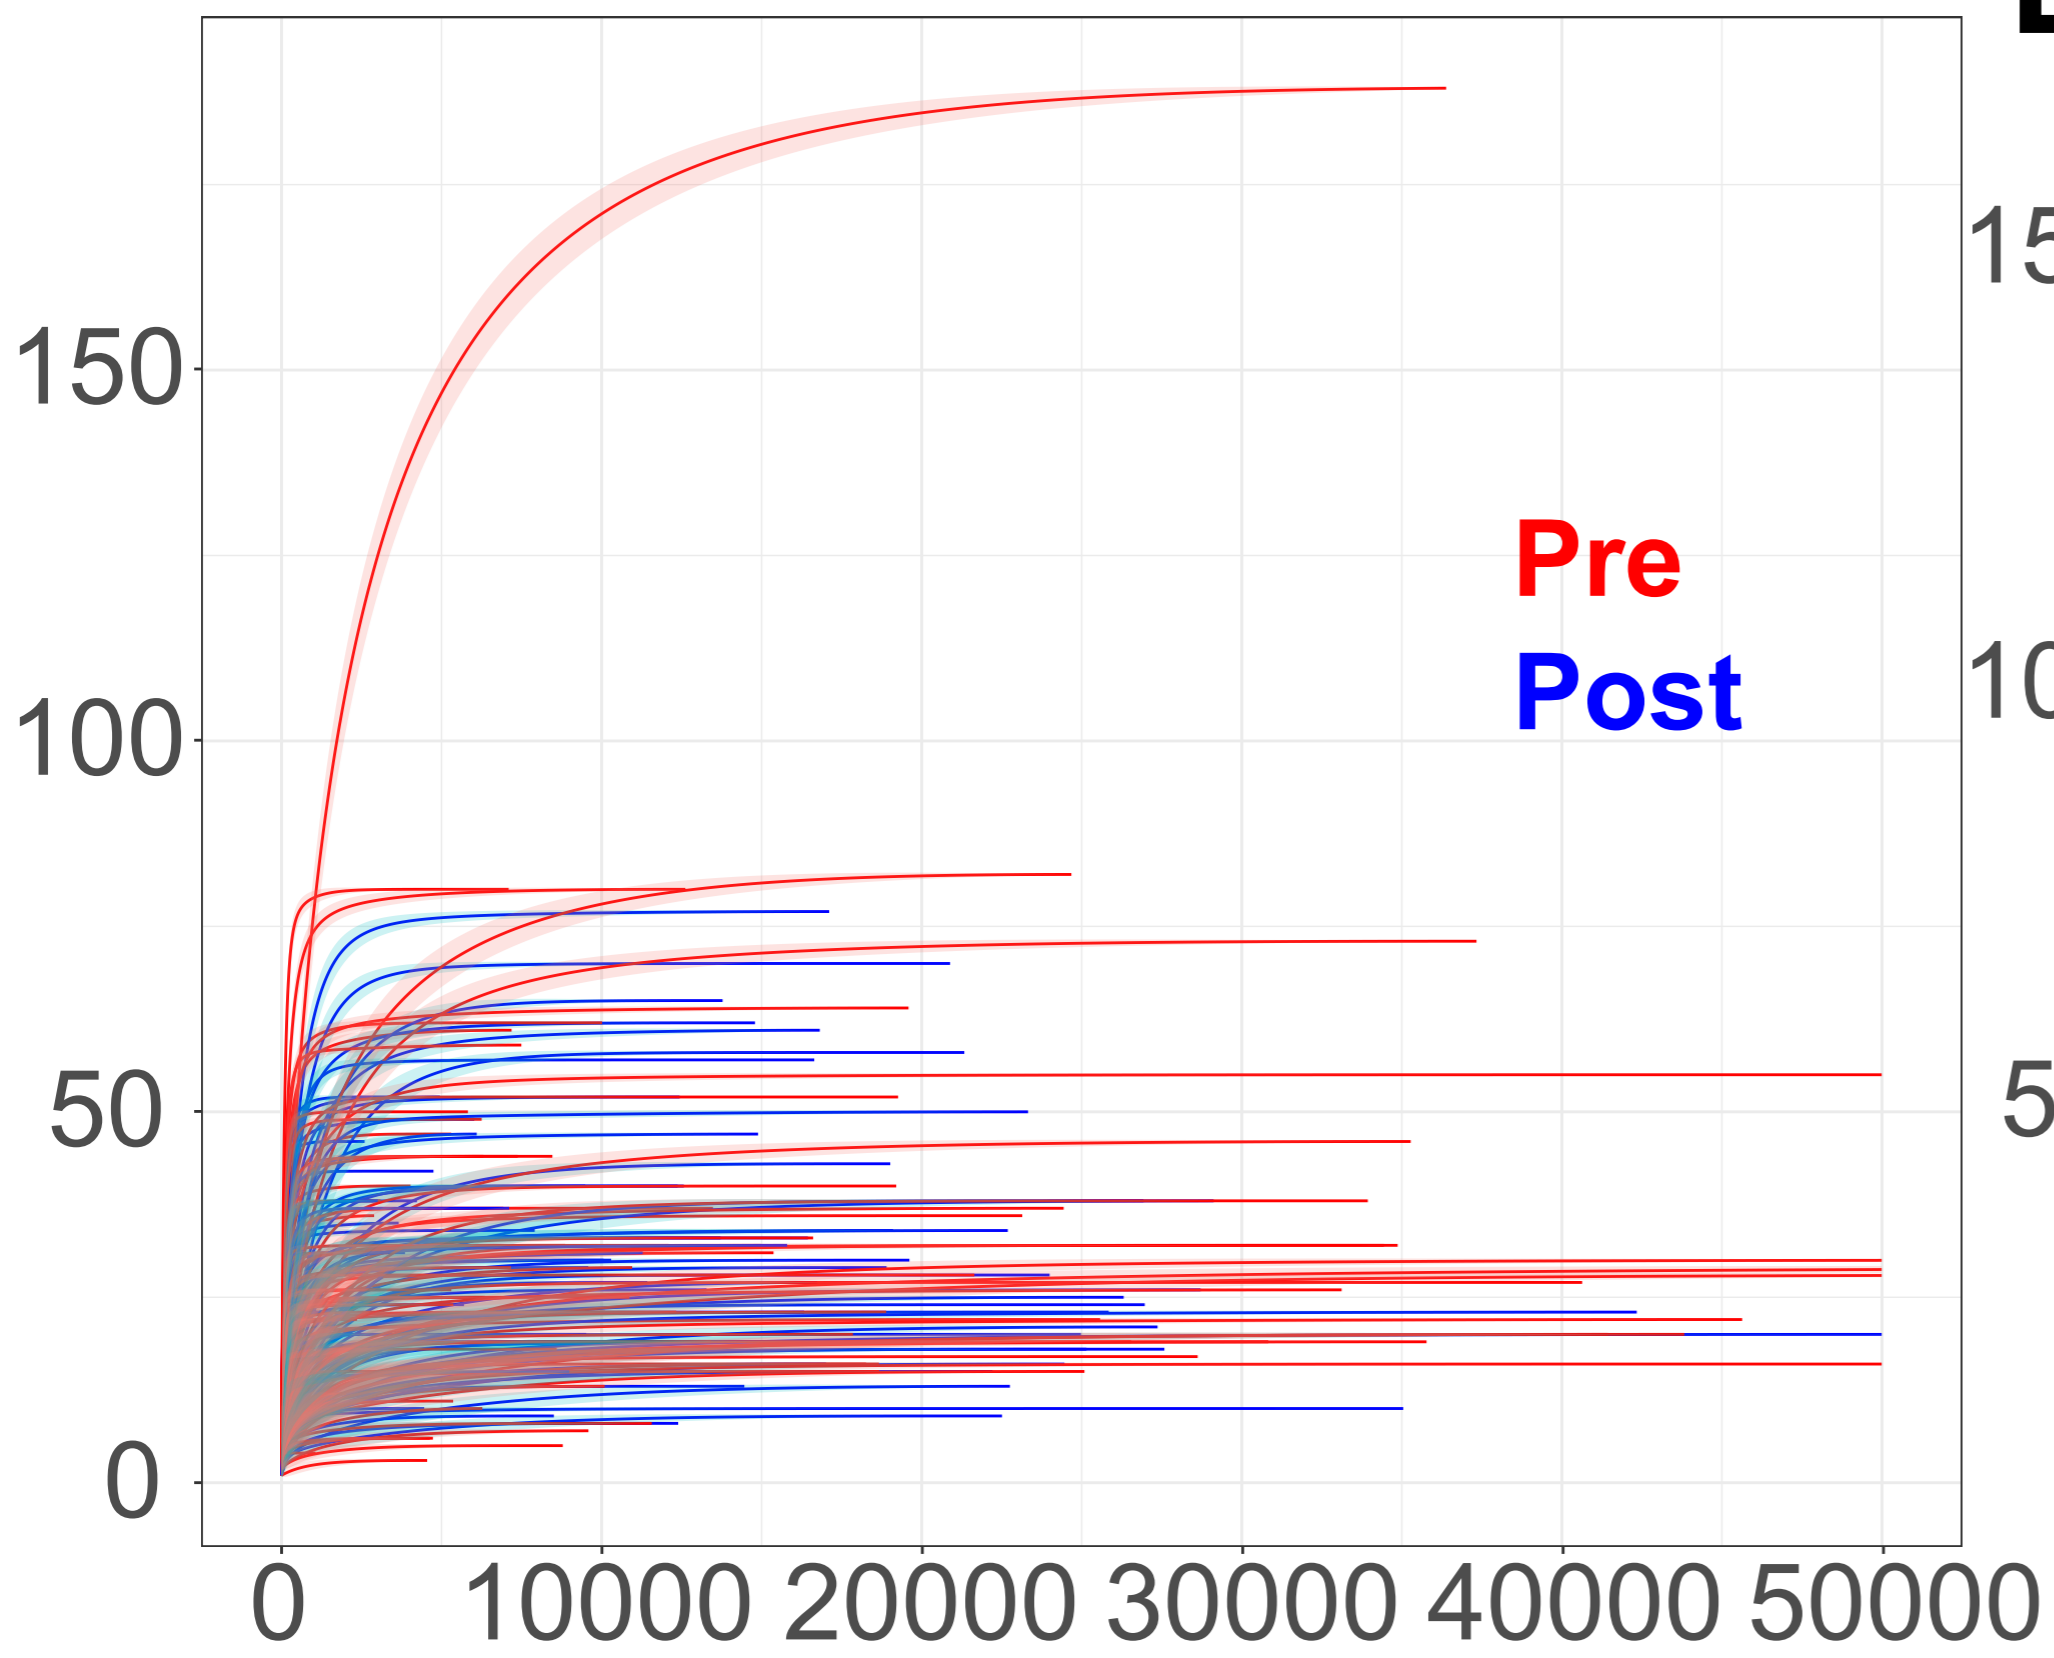

Sequence Sample Size

**B**

150  
100  
50  
0

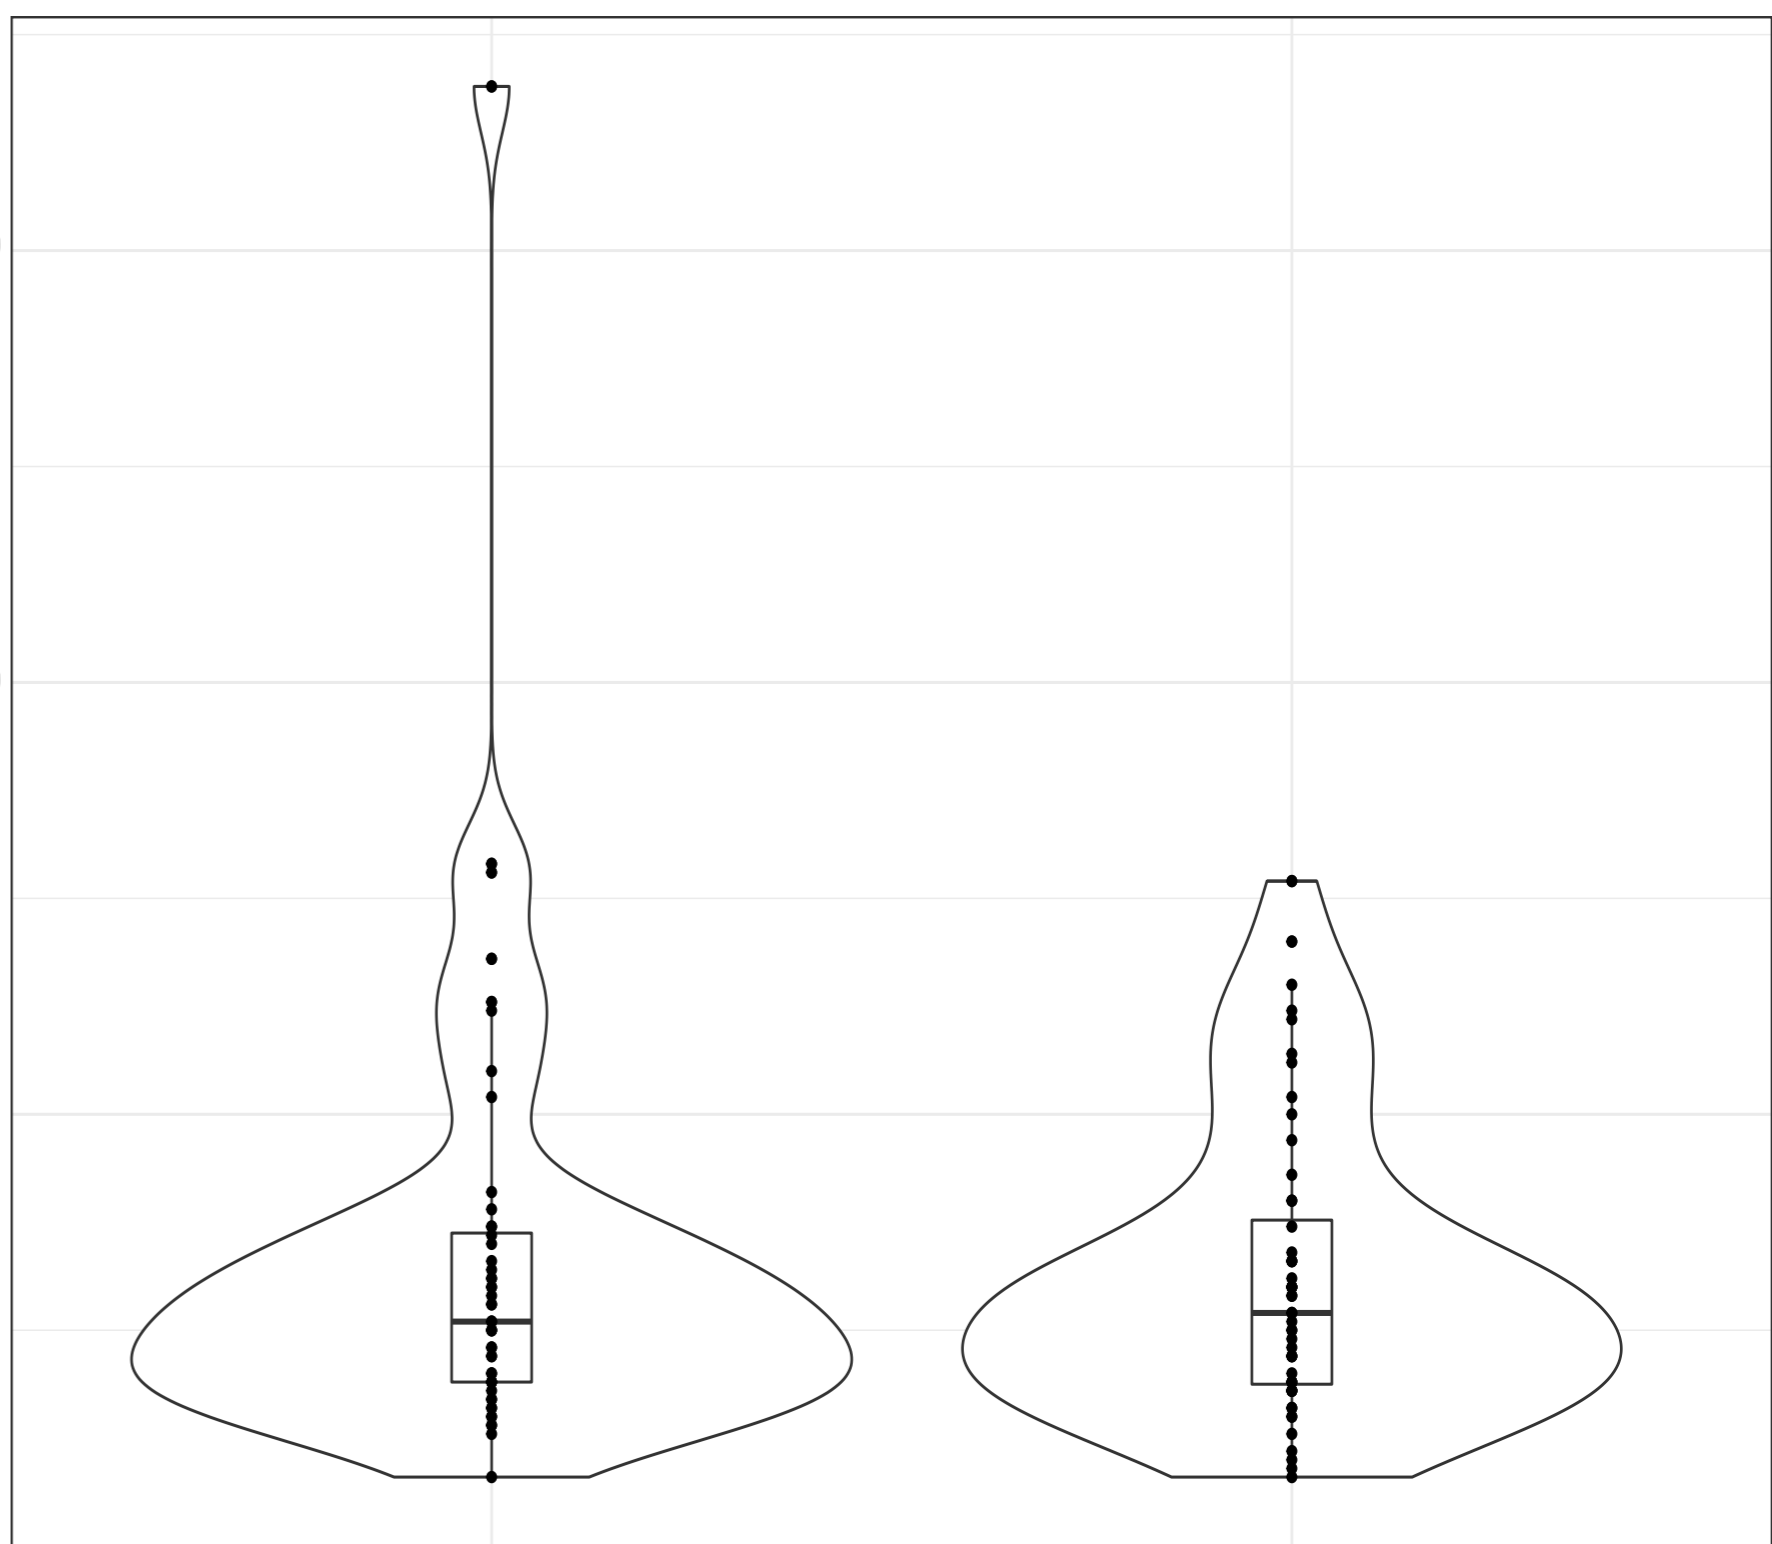

**Pre**

**Post**

| <b>Supplemental Table S 1. RNA Sequencing quality table</b> |               |                 |                                  |                       |
|-------------------------------------------------------------|---------------|-----------------|----------------------------------|-----------------------|
| <b>Sample ID</b>                                            | <b>Mapped</b> | <b>Mapped %</b> | <b>RNA Concentration (ng/ul)</b> | <b>Total RNA (ng)</b> |
| Patient 1                                                   | 70650000      | 96.66           | 20.8                             | 520                   |
| Patient 2                                                   | 56880000      | 97.14           | 2.52                             | 63                    |
| Patient 3                                                   | 66080000      | 96.94           | 45.9                             | 1147.5                |
| Patient 4                                                   | 65540000      | 97.61           | 9.8                              | 245                   |
| Patient 5                                                   | 72460000      | 97.99           | 153                              | 3825                  |
| Patient 6                                                   | 66200000      | 97.71           | 9.5                              | 237.5                 |
| Patient 7                                                   | 60190000      | 97.93           | 26                               | 650                   |
| Patient 8                                                   | 44740000      | 97.22           | 56.7                             | 1417.5                |
| Patient 9                                                   | 31815000      | 95.94           | 6.5                              | 162.5                 |
| Patient 10                                                  | 47330000      | 96.65           | 46.6                             | 1165                  |
| Patient 11                                                  | 61330000      | 96.03           | 21.3                             | 532.5                 |
| Patient 12                                                  | 88200000      | 96.98           | 42.2                             | 1055                  |
| Patient 13                                                  | 74900000      | 97.37           | 5.7                              | 142.5                 |
| Patient 14                                                  | 69320000      | 97.4            | 16.8                             | 420                   |
| Patient 15                                                  | 51330000      | 97.63           | 2.59                             | 64.75                 |
| Patient 16                                                  | 71830000      | 97.01           | 5.26                             | 131.5                 |
| Patient 17                                                  | 59910000      | 96.5            | 3.13                             | 78.25                 |
| Patient 18                                                  | 35090000      | 96.97           | 13.8                             | 345                   |
| Patient 19                                                  | 55820000      | 97.15           | 119                              | 2975                  |
| Patient 20                                                  | 57900000      | 97.53           | 16                               | 400                   |
| Patient 21                                                  | 53020000      | 97.4            | 37                               | 925                   |
| Patient 22                                                  | 44050000      | 93.7            | 11.3                             | 282.5                 |
| Patient 23                                                  | 49040000      | 95.96           | 9.4                              | 235                   |
| Patient 24                                                  | 38680000      | 96.38           | 81.3                             | 2032.5                |
| Patient 25                                                  | 47710000      | 97.12           | 10.2                             | 255                   |
